# Supplementary material for: Evolution of Fitness Cost-Neutral Mutant PfCRT Conferring P. falciparum 4-Aminoquinoline Drug Resistance Is Accompanied by Altered Parasite Metabolism and Digestive Vacuole Physiology
Source: PubMed Central journal article supplement (PMC5104409; doi:10.1371/journal.ppat.1005976), 2016-11-10
Supplement: ppat.1005976.s008.pdf [file ppat.1005976.s008.pdf]

**S1 Table. Primers used in this study.**

| <b>Primer</b> | <b>Oligonucleotide sequence (5' → 3')</b>    | <b>Description</b>                 | <b>Lab name</b> |
|---------------|----------------------------------------------|------------------------------------|-----------------|
| p1            | A <u>ACCATGGATTTATTGTGTAATAATTGAATCGACG</u>  | NcoI- <i>pfcr</i> exon 13 R        | p1640           |
| p2            | CCCTTGT <u>CGACCTTAACAGATGGCTC</u>           | Sall- <i>pfcr</i> intron1-exon 2 F | p3519           |
| p3            | TCAAACATGACAAGGGAAATAGT                      | <i>pfcr</i> exon 5 F               | p2427           |
| p4            | CCAAGAATAAACATGCGAAACC                       | <i>pfcr</i> exon 7 R               | p3806           |
| p5            | CTTGAATTCGACCTTAACAGATGGCTCAC                | <i>pfcr</i> exon 2 F               | p3264           |
| p6            | CTTATCGATAAGCAGAAGAACATATTAATAGGAATACTTAATTG | <i>pfcr</i> exon 3 R               | p3265           |
| p7            | CTTGGGCCCAAGTTGTACTGCTTCTAAGC                | <i>pfcr</i> gDNA 5' UTR F          | p3404           |
| p8            | CTCGAGATGGTTGGTTCGCTAAACTGC                  | <i>hdhfr</i> F                     | p3315           |
| p9            | TTGACCCTTATATATTCCACCCA                      | <i>pfcr</i> gDNA 3' UTR R          | p3403           |
| p10           | GAGGCGCCTATTTCAAAAATCTTAGCATAAGGATT          | <i>pbcr</i> 3' UTR R               | p1644           |

Nucleotides corresponding to restriction sites are underlined. F, forward; R, reverse; *hdhfr*, human dihydrofolate reductase; gDNA, genomic DNA; *pbcr*, *P. berghei chloroquine resistance transporter*; UTR, untranslated region.
