# Supplementary material for: Evolution of Fitness Cost-Neutral Mutant PfCRT Conferring P. falciparum 4-Aminoquinoline Drug Resistance Is Accompanied by Altered Parasite Metabolism and Digestive Vacuole Physiology
Source: PubMed Central journal article supplement (PMC5104409; doi:10.1371/journal.ppat.1005976), 2016-11-10
Supplement: ppat.1005976.s009.pdf [file ppat.1005976.s009.pdf]

**S2 Table. Antimalarial IC<sub>50</sub> and IC<sub>90</sub> values of *pfprt*-modified and reference parasite lines (page 1 of 3).**

|                        | GC03 <sup>Cam734</sup> back-mutants |               |               |               |            |               |                      |                     |               |               |
|------------------------|-------------------------------------|---------------|---------------|---------------|------------|---------------|----------------------|---------------------|---------------|---------------|
|                        | GC03 <sup>Cam734</sup>              | D75N          | F144A         | I148L         | T194I      | S333T         | GC03 <sup>GC03</sup> | GC03 <sup>Dd2</sup> | GC03          | Dd2           |
| CQ IC <sub>50</sub>    | 73.4 ± 5.2                          | 42.8 ± 4.7    | 11.4 ± 1.1    | 34.2 ± 3.3    | 56.1 ± 3.7 | 38.4 ± 4.5    | 14.0 ± 1.6           | 189 ± 19.2          | 11.8 ± 0.7    | 217 ± 16.7    |
| <i>n</i>               | 12                                  | 6             | 6             | 5             | 5          | 6             | 10                   | 10                  | 5             | 5             |
| <i>P</i>               | –                                   | <b>0.002</b>  | <b>0.0001</b> | <b>0.0006</b> | 0.06       | <b>0.0008</b> | <b>&lt; 0.0001</b>   | <b>&lt; 0.0001</b>  | <b>0.0003</b> | <b>0.0003</b> |
| CQ IC <sub>90</sub>    | 148 ± 10.1                          | 91.4 ± 9.0    | 27.8 ± 2.2    | 87.2 ± 3.9    | 114 ± 7.1  | 81 ± 9.3      | 23.1 ± 2.1           | 329 ± 25.6          | 20.9 ± 2.2    | 412 ± 30      |
| <i>n</i>               | 12                                  | 6             | 6             | 5             | 5          | 6             | 10                   | 9                   | 5             | 5             |
| <i>P</i>               | –                                   | <b>0.002</b>  | <b>0.0001</b> | <b>0.0003</b> | 0.08       | <b>0.0004</b> | <b>&lt; 0.0001</b>   | <b>&lt; 0.0001</b>  | <b>0.0003</b> | <b>0.0003</b> |
| Hill Slopes            | 3.4 ± 0.1                           | 3.3 ± 0.1     | 3.1 ± 0.2     | 2.9 ± 0.2     | 3.5 ± 0.2  | 3.2 ± 0.2     | 5.6 ± 0.4            | 3.2 ± 0.3           | 5.8 ± 0.3     | 4.9 ± 0.1     |
| CQ+VP IC <sub>50</sub> | 40.5 ± 4.0                          | 41.1 ± 8.4    | 10.8 ± 2.6    | 31.2 ± 1.9    | 33.2 ± 3.0 | 23.4 ± 6.0    | 18.0 ± 2.1           | 29.2 ± 4.6          | 14.8 ± 2.9    | 68.7 ± 10.2   |
| <i>n</i>               | 12                                  | 6             | 6             | 5             | 5          | 6             | 10                   | 10                  | 5             | 5             |
| <i>P</i>               | –                                   | 0.75          | <b>0.002</b>  | 0.08          | 0.15       | <b>0.024</b>  | <b>0.0011</b>        | <b>0.05</b>         | <b>0.006</b>  | <b>0.027</b>  |
| CQ+VP IC <sub>90</sub> | 103 ± 9.2                           | 86.4 ± 16.5   | 30.8 ± 7.8    | 89.8 ± 9.7    | 88.3 ± 7.9 | 63.6 ± 15.7   | 31.9 ± 4.5           | 110 ± 13.7          | 23.2 ± 4.5    | 156 ± 14.1    |
| <i>n</i>               | 12                                  | 6             | 6             | 5             | 5          | 6             | 10                   | 10                  | 5             | 5             |
| <i>P</i>               | –                                   | 0.58          | <b>0.0013</b> | 0.15          | 0.12       | <b>0.032</b>  | <b>0.0002</b>        | 0.67                | <b>0.002</b>  | <b>0.02</b>   |
| Hill Slopes            | 2.7 ± 0.1                           | 2.9 ± 0.1     | 3.2 ± 0.2     | 2.7 ± 0.2     | 2.8 ± 0.2  | 2.8 ± 0.2     | 5.6 ± 0.3            | 2.3 ± 0.1           | 5.9 ± 0.4     | 3.7 ± 0.3     |
| md-CQ IC <sub>50</sub> | 489 ± 36.1                          | 320 ± 26.5    | 31.9 ± 3.5    | 131 ± 17.7    | 404 ± 15.2 | 317 ± 27.2    | 18.6 ± 0.8           | 804 ± 60.2          | 20.4 ± 1.6    | 948 ± 83.2    |
| <i>n</i>               | 12                                  | 6             | 6             | 5             | 5          | 6             | 10                   | 10                  | 5             | 5             |
| <i>P</i>               | –                                   | <b>0.003</b>  | <b>0.0001</b> | <b>0.0003</b> | 0.1        | <b>0.007</b>  | <b>&lt; 0.0001</b>   | <b>&lt; 0.0001</b>  | <b>0.0003</b> | <b>0.0003</b> |
| md-CQ IC <sub>90</sub> | 925 ± 66.7                          | 653 ± 74.5    | 104 ± 4.6     | 301 ± 34.6    | 823 ± 38.1 | 650 ± 68.1    | 34.6 ± 1.6           | 1582 ± 94           | 36.9 ± 4.0    | 1522 ± 100    |
| <i>n</i>               | 12                                  | 6             | 6             | 5             | 5          | 6             | 10                   | 10                  | 5             | 5             |
| <i>P</i>               | –                                   | <b>0.007</b>  | <b>0.0001</b> | <b>0.0003</b> | 0.18       | <b>0.007</b>  | <b>&lt; 0.0001</b>   | <b>&lt; 0.0001</b>  | <b>0.0003</b> | <b>0.002</b>  |
| Hill Slopes            | 3.1 ± 0.1                           | 3.1 ± 0.1     | 2.3 ± 0.1     | 2.7 ± 0.2     | 3.0 ± 0.1  | 3.1 ± 0.1     | 3.5 ± 0.3            | 3.6 ± 0.2           | 4.7 ± 0.5     | 4.3 ± 0.6     |
| md-AQ IC <sub>50</sub> | 61.1 ± 3.1                          | 40.9 ± 2.1    | 15.2 ± 1.6    | 27.0 ± 1.0    | 50.9 ± 3.1 | 42.5 ± 3.8    | 14.6 ± 1.3           | 58.8 ± 3.7          | 13.8 ± 1.5    | 66.9 ± 7.4    |
| <i>n</i>               | 12                                  | 6             | 6             | 5             | 5          | 6             | 10                   | 10                  | 5             | 5             |
| <i>P</i>               | –                                   | <b>0.0004</b> | <b>0.0001</b> | <b>0.0003</b> | 0.08       | <b>0.003</b>  | <b>&lt; 0.0001</b>   | 0.75                | <b>0.0003</b> | 0.57          |
| md-AQ IC <sub>90</sub> | 107 ± 4.4                           | 67.9 ± 6.0    | 24.8 ± 2.3    | 52.4 ± 2.4    | 92.0 ± 9.0 | 72.9 ± 8.2    | 21.4 ± 2.2           | 105 ± 7.1           | 20.1 ± 3.3    | 111 ± 5.5     |
| <i>n</i>               | 12                                  | 6             | 6             | 5             | 5          | 6             | 10                   | 10                  | 5             | 5             |
| <i>P</i>               | –                                   | <b>0.0008</b> | <b>0.0001</b> | <b>0.0003</b> | 0.08       | <b>0.003</b>  | <b>&lt; 0.0001</b>   | 0.53                | <b>0.0003</b> | 0.57          |
| Hill Slopes            | 4.0 ± 0.2                           | 4.6 ± 0.3     | 5.0 ± 0.3     | 3.7 ± 0.2     | 4.3 ± 0.1  | 4.4 ± 0.3     | 9.0 ± 0.7            | 4.3 ± 0.4           | 7.4 ± 1.4     | 5.5 ± 0.5     |

S2 Table (page 2 of 3).

|                      | GC03 <sup>Cam734</sup> back-mutants |             |              |              |             |             | GC03 <sup>GC03</sup> | GC03 <sup>Dd2</sup> | GC03         | Dd2           |
|----------------------|-------------------------------------|-------------|--------------|--------------|-------------|-------------|----------------------|---------------------|--------------|---------------|
|                      | GC03 <sup>Cam734</sup>              | D75N        | F144A        | I148L        | T194I       | S333T       |                      |                     |              |               |
| QN IC <sub>50</sub>  | 37.2 ± 4.2                          | 39.7 ± 5.8  | 23.9 ± 2.3   | 26.8 ± 3.4   | 36.4 ± 1.8  | 37.4 ± 4.8  | 55.1 ± 4.6           | 39.3 ± 4.2          | 65.4 ± 11.5  | 91.7 ± 11.7   |
| <i>n</i>             | 10                                  | 6           | 6            | 5            | 3           | 6           | 10                   | 10                  | 3            | 3             |
| <i>P</i>             | –                                   | 0.71        | <b>0.011</b> | 0.1          | 0.81        | 0.86        | <b>0.0052</b>        | 0.52                | <b>0.028</b> | <b>0.007</b>  |
| QN IC <sub>90</sub>  | 144 ± 11.0                          | 114 ± 13.1  | 77.9 ± 6.7   | 120 ± 15.8   | 114 ± 12.4  | 108 ± 10.0  | 171 ± 6.5            | 157 ± 11.6          | 173 ± 6.3    | 290 ± 52.5    |
| <i>n</i>             | 10                                  | 6           | 6            | 5            | 3           | 6           | 10                   | 10                  | 3            | 3             |
| <i>P</i>             | –                                   | 0.11        | <b>0.001</b> | 0.2          | 0.24        | 0.07        | 0.09                 | 0.43                | 0.16         | <b>0.014</b>  |
| Hill Slopes          | 1.9 ± 0.1                           | 2.3 ± 0.1   | 2.3 ± 0.1    | 1.8 ± 0.1    | 2.1 ± 0.1   | 2.2 ± 0.2   | 2.3 ± 0.1            | 1.9 ± 0.1           | 2.2 ± 0.3    | 2.2 ± 0.1     |
| PPQ IC <sub>50</sub> | 9.1 ± 0.6                           | 11.9 ± 1.2  | 11.1 ± 0.6   | 14.1 ± 1.5   | 9.8 ± 1.2   | 9.8 ± 0.5   | 11.1 ± 0.5           | 13.3 ± 1.1          | 10.4 ± 0.6   | 12.2 ± 0.7    |
| <i>n</i>             | 8                                   | 6           | 6            | 3            | 3           | 6           | 8                    | 8                   | 3            | 3             |
| <i>P</i>             | –                                   | 0.11        | 0.08         | <b>0.049</b> | 0.38        | 0.49        | 0.1                  | <b>0.007</b>        | 0.5          | <b>0.049</b>  |
| PPQ IC <sub>90</sub> | 21.4 ± 1.9                          | 25.0 ± 1.2  | 26.6 ± 0.6   | 28.6 ± 1.2   | 21.3 ± 3.2  | 22.0 ± 1.7  | 20.4 ± 1.8           | 27.9 ± 2.7          | 17.1 ± 2.2   | 25.9 ± 1.2    |
| <i>n</i>             | 8                                   | 6           | 6            | 3            | 3           | 6           | 8                    | 8                   | 3            | 3             |
| <i>P</i>             | –                                   | 0.28        | 0.08         | <b>0.049</b> | 0.67        | > 0.99      | 0.7                  | 0.07                | 0.17         | 0.28          |
| Hill Slopes          | 2.5 ± 0.2                           | 3.0 ± 0.2   | 2.4 ± 0.1    | 3.0 ± 0.2    | 3.3 ± 0.4   | 2.8 ± 0.2   | 4.0 ± 0.3            | 2.9 ± 0.1           | 5.2 ± 0.7    | 3.5 ± 0.5     |
| LUM IC <sub>50</sub> | 1.03 ± 0.07                         | 1.30 ± 0.14 | 1.07 ± 0.04  | 1.09 ± 0.07  | 1.37 ± 0.21 | 1.32 ± 0.10 | 2.13 ± 0.13          | 1.08 ± 0.10         | 2.08 ± 0.07  | 1.07 ± 0.03   |
| <i>n</i>             | 6                                   | 5           | 5            | 2            | 2           | 5           | 6                    | 6                   | 3            | 2             |
| <i>P</i>             | –                                   | 0.13        | 0.65         | 0.64         | 0.14        | 0.052       | <b>0.002</b>         | 0.91                | <b>0.024</b> | 0.86          |
| LUM IC <sub>90</sub> | 4.63 ± 0.37                         | 4.94 ± 0.41 | 4.42 ± 0.21  | 4.60 ± 0.05  | 4.98 ± 0.56 | 5.40 ± 0.58 | 7.56 ± 0.47          | 5.73 ± 0.81         | 8.33 ± 0.31  | 6.52 ± 0.57   |
| <i>n</i>             | 6                                   | 5           | 5            | 2            | 2           | 5           | 6                    | 6                   | 3            | 2             |
| <i>P</i>             | –                                   | 0.77        | 0.87         | 0.64         | 0.43        | 0.42        | <b>0.004</b>         | 0.42                | <b>0.024</b> | 0.14          |
| Hill Slopes          | 1.7 ± 0.1                           | 1.6 ± 0.1   | 1.9 ± 0.1    | 1.3 ± 0.2    | 2.2 ± 0.2   | 1.9 ± 0.1   | 2.0 ± 0.2            | 1.7 ± 0.1           | 1.8 ± 0.1    | 1.6 ± 0.2     |
| AS IC <sub>50</sub>  | 0.67 ± 0.08                         | 0.84 ± 0.12 | 0.52 ± 0.07  | 0.86 ± 0.05  | 0.83 ± 0.16 | 0.73 ± 0.08 | 1.17 ± 0.13          | 0.73 ± 0.11         | 0.90 ± 0.01  | 1.83 ± 0.21   |
| <i>n</i>             | 7                                   | 5           | 5            | 7            | 2           | 5           | 7                    | 7                   | 3            | 6             |
| <i>P</i>             | –                                   | 0.29        | 0.2          | 0.18         | 0.39        | 0.56        | <b>0.007</b>         | 0.56                | 0.18         | <b>0.0012</b> |
| AS IC <sub>90</sub>  | 2.31 ± 0.36                         | 2.33 ± 0.29 | 1.94 ± 0.08  | 3.37 ± 0.33  | 2.24 ± 0.03 | 2.31 ± 0.11 | 3.57 ± 0.35          | 2.53 ± 0.45         | 2.83 ± 0.29  | 4.03 ± 0.41   |
| <i>n</i>             | 7                                   | 5           | 5            | 7            | 2           | 5           | 7                    | 7                   | 3            | 6             |
| <i>P</i>             | –                                   | 0.55        | 0.5          | 0.053        | 0.5         | 0.36        | <b>0.018</b>         | 0.31                | 0.18         | <b>0.022</b>  |
| Hill Slopes          | 1.9 ± 0.2                           | 2.6 ± 0.3   | 1.7 ± 0.4    | 2.0 ± 0.2    | 2.6 ± 0.6   | 2.2 ± 0.3   | 2.7 ± 0.2            | 2.1 ± 0.4           | 2.4 ± 0.2    | 4.2 ± 0.4     |

S2 Table (page 3 of 3).

|                      | GC03 <sup>Cam734</sup> | GC03 <sup>Cam734</sup> back-mutants |           |           |           |           | GC03 <sup>GC03</sup> | GC03 <sup>Dd2</sup> | GC03      | Dd2       |
|----------------------|------------------------|-------------------------------------|-----------|-----------|-----------|-----------|----------------------|---------------------|-----------|-----------|
|                      |                        | D75N                                | F144A     | I148L     | T194I     | S333T     |                      |                     |           |           |
| PND IC <sub>50</sub> | 5.0 ± 0.3              | 6.2 ± 0.3                           | 5.9 ± 0.3 | 5.0 ± 0.4 | 5.6 ± 0.8 | 5.9 ± 0.3 | 6.5 ± 0.2            | 5.3 ± 0.5           | 5.8 ± 0.4 | 5.7 ± 0.7 |
| <i>n</i>             | 8                      | 4                                   | 4         | 3         | 3         | 4         | 6                    | 6                   | 5         | 3         |
| <i>P</i>             | –                      | 0.073                               | 0.15      | 0.78      | 0.5       | 0.15      | <b>0.008</b>         | 0.41                | 0.17      | 0.19      |
| PND IC <sub>90</sub> | 7.9 ± 0.4              | 8.7 ± 0.1                           | 8.7 ± 0.1 | 8.4 ± 0.6 | 8.8 ± 0.3 | 8.7 ± 0.1 | 9.7 ± 0.6            | 9.1 ± 0.6           | 8.7 ± 0.1 | 8.7 ± 0.1 |
| <i>n</i>             | 8                      | 4                                   | 4         | 3         | 3         | 4         | 6                    | 6                   | 5         | 3         |
| <i>P</i>             | –                      | 0.28                                | 0.28      | 0.5       | 0.28      | 0.48      | <b>0.011</b>         | 0.34                | 0.18      | 0.19      |
| Hill Slopes          | 5.4 ± 0.8              | 7.8 ± 1.4                           | 6.4 ± 0.9 | 4.9 ± 0.2 | 4.4 ± 0.9 | 6.5 ± 0.9 | 7.4 ± 1.1            | 4.9 ± 0.7           | 7.1 ± 1.0 | 7.3 ± 1.6 |

IC<sub>50</sub> and IC<sub>90</sub> values (nM) indicate the mean ± SEM, as determined in 2 to 12 independent assays performed in duplicate. CQ + VP assays were performed with 0.8 μM VP. CQ, chloroquine; VP, verapamil; md-CQ, monodesethyl-chloroquine; md-AQ, monodesethyl-amodiaquine; QN, quinine; PPQ, piperaquine; LUM, lumefantrine; AS, artesunate; PND, pyronaridine; *n*, number of assays. *P* values were determined in a non-parametric Mann-Whitney *U* test versus the parasite line GC03<sup>Cam734</sup>. *P* values <0.05 are indicated in bold and shaded in gray. Hill slopes were calculated from the dose-response data using GraphPad Prism 6 software.
