# Supplementary material for: Evolution of Fitness Cost-Neutral Mutant PfCRT Conferring P. falciparum 4-Aminoquinoline Drug Resistance Is Accompanied by Altered Parasite Metabolism and Digestive Vacuole Physiology
Source: PubMed Central journal article supplement (PMC5104409; doi:10.1371/journal.ppat.1005976), 2016-11-10
Supplement: ppat.1005976.s011.pdf [file ppat.1005976.s011.pdf]

**S4 Table. *In vitro* growth selection coefficients of *pfcr*t-modified and reference parasite lines.**

| Line                         |                       | No drug            | 7.5 nM CQ          | Line                         |                       | No drug            | 7.5 nM CQ          |
|------------------------------|-----------------------|--------------------|--------------------|------------------------------|-----------------------|--------------------|--------------------|
| GC03 <sup>Cam734</sup>       | <i>s</i>              | 0.00 ± 0.008       | 0.18 ± 0.026       | GC03 <sup>Cam734 S333T</sup> | <i>s</i>              | -0.17 ± 0.008      | -0.19 ± 0.009      |
|                              | <i>P</i> <sub>1</sub> | –                  | –                  |                              | <i>P</i> <sub>1</sub> | <b>&lt; 0.0001</b> | <b>&lt; 0.0001</b> |
|                              | <i>P</i> <sub>2</sub> | <b>&lt; 0.0001</b> |                    |                              | <i>P</i> <sub>2</sub> | 0.69               |                    |
| GC03 <sup>Cam734 D75N</sup>  | <i>s</i>              | -0.11 ± 0.009      | -0.11 ± 0.011      | GC03 <sup>GC03</sup>         | <i>s</i>              | 0.06 ± 0.007       | 0.03 ± 0.008       |
|                              | <i>P</i> <sub>1</sub> | <b>&lt; 0.0001</b> | <b>&lt; 0.0001</b> |                              | <i>P</i> <sub>1</sub> | <b>0.002</b>       | <b>&lt; 0.0001</b> |
|                              | <i>P</i> <sub>2</sub> | > 0.99             |                    |                              | <i>P</i> <sub>2</sub> | 0.71               |                    |
| GC03 <sup>Cam734 F144A</sup> | <i>s</i>              | -0.07 ± 0.009      | -0.14 ± 0.010      | GC03 <sup>Dd2</sup>          | <i>s</i>              | -0.25 ± 0.006      | -0.25 ± 0.007      |
|                              | <i>P</i> <sub>1</sub> | <b>&lt; 0.0001</b> | <b>&lt; 0.0001</b> |                              | <i>P</i> <sub>1</sub> | <b>&lt; 0.0001</b> | <b>&lt; 0.0001</b> |
|                              | <i>P</i> <sub>2</sub> | <b>&lt; 0.0001</b> |                    |                              | <i>P</i> <sub>2</sub> | > 0.99             |                    |
| GC03 <sup>Cam734 I148L</sup> | <i>s</i>              | -0.26 ± 0.006      | -0.30 ± 0.007      | GC03                         | <i>s</i>              | -0.05 ± 0.009      | -0.06 ± 0.009      |
|                              | <i>P</i> <sub>1</sub> | <b>&lt; 0.0001</b> | <b>&lt; 0.0001</b> |                              | <i>P</i> <sub>1</sub> | <b>0.0047</b>      | <b>&lt; 0.0001</b> |
|                              | <i>P</i> <sub>2</sub> | 0.15               |                    |                              | <i>P</i> <sub>2</sub> | 0.99               |                    |
| GC03 <sup>Cam734 T194I</sup> | <i>s</i>              | -0.14 ± 0.009      | -0.15 ± 0.009      |                              |                       |                    |                    |
|                              | <i>P</i> <sub>1</sub> | <b>&lt; 0.0001</b> | <b>&lt; 0.0001</b> |                              |                       |                    |                    |
|                              | <i>P</i> <sub>2</sub> | 0.99               |                    |                              |                       |                    |                    |

Parasite *in vitro* growth was evaluated in the absence or presence of a sub-lethal dose of CQ (7.5 nM; ~0.5×CQ IC<sub>50</sub> of the CQ-sensitive reference line GC03<sup>GC03</sup>) and normalized against GC03<sup>Cam734</sup> in the absence of drug pressure (6 replicates per condition). As detailed in **Materials and Methods**, the per-generation selection coefficient (indicated above as *s* ± SEM) was derived from the relative fitness index ( $\omega'$ ) as per the relationship  $s = \omega' - 1$ , such that  $s < 0$  and  $s > 0$  respectively indicate growth inferior or superior to the GC03<sup>Cam734</sup> parasite line, which encodes the full-length Cam734 *pfcr*t allele. CQ, chloroquine; *P*<sub>1</sub>, *P* value for inter-strain comparisons, determined versus the parasite line GC03<sup>Cam734</sup> using two-way ANOVA with Sidak's post-hoc test; *P*<sub>2</sub>, *P* value for intra-strain comparisons, determined for a given parasite strain in the absence versus presence of 7.5 nM CQ using two-way ANOVA with Sidak's post-hoc test. *P* values <0.05 are indicated in **bold** and shaded in gray.
