# Supplementary material for: Evolution of Fitness Cost-Neutral Mutant PfCRT Conferring P. falciparum 4-Aminoquinoline Drug Resistance Is Accompanied by Altered Parasite Metabolism and Digestive Vacuole Physiology
Source: PubMed Central journal article supplement (PMC5104409; doi:10.1371/journal.ppat.1005976), 2016-11-10
Supplement: ppat.1005976.s013.pdf [file ppat.1005976.s013.pdf]

**S6 Table. Metabolite z-scores and P values (page 1 of 2).**

| Compound class or compound                | Class                        | GC03 <sup>Dd2</sup> |        |        |        | GC03 <sup>Cam734</sup> |        |        |        |        |        | P value |
|-------------------------------------------|------------------------------|---------------------|--------|--------|--------|------------------------|--------|--------|--------|--------|--------|---------|
|                                           |                              | r1                  | r2     | r3     | r4     | r1                     | r2     | r3     | r4     | r5     | r6     |         |
| <b>Compound classes</b>                   |                              |                     |        |        |        |                        |        |        |        |        |        |         |
| ATP/ADP                                   |                              | 0.116               | -1.403 | 0.336  | 0.951  | 6.141                  | 7.376  | 7.472  | 5.765  | 3.015  | 6.699  | 0.0002  |
| ATP/AMP                                   |                              | 0.532               | -1.355 | -0.108 | 0.932  | 4.629                  | 5.476  | 4.802  | 3.922  | 1.606  | 3.413  | 0.0011  |
| Glycolysis                                |                              | -0.593              | 0.987  | -1.090 | 0.696  | 2.616                  | 2.263  | 2.080  | 1.905  | 4.706  | 6.794  | 0.0133  |
| Pentose phosphate pathway (PPP)           |                              | -0.438              | 1.300  | -1.042 | 0.179  | 0.301                  | 0.016  | 0.228  | 0.526  | 0.324  | 1.071  | 0.3740  |
| Tricarboxylic acid (TCA) cycle            |                              | -0.458              | 1.421  | -0.873 | -0.091 | 1.887                  | 1.256  | 2.844  | 2.418  | 1.713  | 3.162  | 0.0035  |
| Nucleotide biosynthesis                   |                              | 0.275               | 1.276  | -0.993 | -0.557 | 2.092                  | 1.854  | -0.371 | -0.083 | -0.069 | 0.692  | 0.3360  |
| Redox                                     |                              | -0.316              | 1.056  | -1.239 | 0.499  | -0.358                 | -0.468 | 0.158  | 0.262  | 0.030  | 0.953  | 0.8439  |
| Cofactors                                 |                              | -0.926              | 1.389  | -0.001 | -0.462 | 2.378                  | 2.349  | 2.060  | 2.758  | 2.045  | 1.323  | 0.0017  |
| Nucleoside triphosphates (nTPs)           |                              | -1.329              | 0.952  | -0.169 | 0.546  | 2.882                  | 2.064  | 3.729  | 3.342  | 2.391  | 3.207  | 0.0004  |
| Nucleoside diphosphates (nDPs)            |                              | -1.003              | 1.378  | -0.299 | -0.075 | -0.722                 | -1.394 | -0.593 | -0.386 | -0.046 | -0.746 | 0.1939  |
| Nucleoside monophosphates (nMPs)          |                              | -0.791              | 1.354  | -0.719 | 0.155  | -1.080                 | -1.004 | -0.382 | -0.225 | -0.514 | -0.057 | 0.2602  |
| Deoxynucleoside triphosphates (dnTPs)     |                              | -1.282              | 1.100  | -0.164 | 0.346  | 1.376                  | 0.972  | 2.161  | 1.820  | 0.969  | 1.668  | 0.0123  |
| Deoxynucleoside diphosphates (dnDPs)      |                              | -0.885              | 1.420  | -0.436 | -0.099 | -0.991                 | -1.514 | -0.764 | -0.669 | -0.691 | -1.023 | 0.0586  |
| Deoxynucleoside monophosphates (dnMPs)    |                              | -0.943              | 1.317  | 0.205  | -0.579 | -0.756                 | -0.924 | -0.703 | -0.684 | -0.308 | -0.780 | 0.1290  |
| Nucleotide conjugates                     |                              | 1.377               | -0.401 | -0.971 | -0.004 | -0.526                 | -0.836 | -1.015 | -0.824 | -0.940 | -0.446 | 0.1006  |
| N-Acetyl (NAc)-Amino Acids                |                              | -0.794              | 1.082  | -0.904 | 0.616  | 0.388                  | 0.379  | 0.545  | 1.260  | 1.266  | 2.157  | 0.0974  |
| Aromatic amino acids                      |                              | -0.819              | 1.454  | -0.400 | -0.235 | 1.313                  | 1.687  | 1.385  | 1.295  | 1.636  | 1.258  | 0.0081  |
| Peptides                                  |                              | -0.879              | 1.089  | -0.819 | 0.609  | -0.344                 | -0.513 | -0.514 | -0.243 | -0.953 | -0.075 | 0.3296  |
| <b>Individual compounds</b>               |                              |                     |        |        |        |                        |        |        |        |        |        |         |
| 2,3-bisphosphoglycerate (2,3-BPG)         | Glycolysis                   | -0.659              | 0.603  | -1.021 | 1.077  | 3.886                  | 3.810  | 3.489  | 2.110  | 8.195  | 10.010 | 0.0123  |
| 3-phosphoglycerate (3-PG)                 | Glycolysis                   | -0.850              | 1.270  | -0.747 | 0.327  | 0.406                  | 0.568  | 1.351  | 1.329  | 3.498  | 4.388  | 0.0708  |
| D-glyceraldehyde-3-phosphate (PGAL)       | Glycolysis                   | -0.947              | 1.158  | -0.714 | 0.503  | 0.378                  | 0.108  | 0.611  | 0.155  | 0.075  | 2.081  | 0.3372  |
| Dihydroxy-acetone-phosphate (DHAP)        | Glycolysis                   | -0.530              | 1.278  | -1.009 | 0.260  | 0.227                  | 0.993  | 0.502  | 1.771  | 4.219  | 4.424  | 0.0844  |
| Fructose-1,6-bisphosphate (F-1,6-BP)      | Glycolysis                   | -0.125              | 0.252  | -1.270 | 1.143  | 2.113                  | 1.869  | 2.065  | 2.923  | 8.773  | 9.039  | 0.0389  |
| Glucose-6-phosphate (G-6-P)               | Glycolysis                   | -0.680              | 1.305  | -0.878 | 0.253  | 0.784                  | 1.035  | 1.072  | 1.505  | 0.909  | 1.774  | 0.0279  |
| Phosphoenolpyruvate (PEP)                 | Glycolysis                   | -0.571              | 0.849  | -1.117 | 0.840  | 4.995                  | 3.946  | 3.226  | 2.538  | 6.950  | 12.300 | 0.0168  |
| sn-Glycerol-3-phosphate (sn-Glycerol-3-P) | Glycolysis                   | -0.360              | 1.075  | -1.212 | 0.496  | 1.137                  | 0.312  | 0.116  | 0.437  | 0.458  | 0.793  | 0.2500  |
| 4-aminobutyrate (GABA)                    | TCA-associated               | -0.534              | 1.043  | -1.120 | 0.611  | 4.081                  | 3.152  | 5.837  | 4.517  | 2.196  | 3.973  | 0.0007  |
| α-ketoglutarate (α-KG)                    | TCA-associated               | -1.031              | 0.199  | -0.465 | 1.297  | 2.292                  | 2.868  | 1.068  | 0.758  | 3.760  | 3.316  | 0.0128  |
| Citrate                                   | TCA-associated               | -0.896              | 1.409  | -0.456 | -0.058 | 1.202                  | 1.999  | 1.672  | 2.282  | 2.302  | 1.563  | 0.0037  |
| Fumarate                                  | TCA-associated               | -0.514              | 1.387  | -0.900 | 0.027  | -0.036                 | -0.272 | 0.054  | 0.168  | -0.010 | 0.774  | 0.8015  |
| Glutamate                                 | TCA-associated               | -0.061              | 1.432  | -0.624 | -0.746 | 2.687                  | 1.466  | 4.114  | 3.337  | 2.334  | 4.680  | 0.0026  |
| Malate                                    | TCA-associated               | -0.540              | 1.187  | -1.062 | 0.415  | 0.718                  | 0.639  | 0.005  | 0.649  | 0.208  | 1.101  | 0.2466  |
| Succinate                                 | TCA-associated               | -0.845              | 1.134  | -0.836 | 0.547  | -0.164                 | -0.190 | 1.283  | 0.747  | 1.307  | 1.411  | 0.2177  |
| 6-phospho-D-gluconate (6-P-D-gluconate)   | Pentose phosphate pathway    | -0.836              | 1.204  | -0.811 | 0.442  | 0.142                  | 0.173  | 0.342  | 0.809  | 0.465  | 1.480  | 0.2634  |
| D-erythrose-4-phosphate (D-erythrose-4-P) | Pentose phosphate pathway    | -0.837              | 1.184  | -0.820 | 0.473  | 0.252                  | 0.427  | 0.301  | 0.138  | -0.192 | 1.105  | 0.4755  |
| D-gluconate                               | Pentose phosphate pathway    | 0.253               | 1.123  | -1.292 | -0.084 | -0.170                 | -0.941 | -0.793 | -0.250 | 0.038  | 0.248  | 0.5188  |
| D-sedoheptulose-7-phosphate (D-S-7-P)     | Pentose phosphate pathway    | -0.286              | 1.406  | -0.956 | -0.164 | 1.490                  | 0.861  | 0.897  | 0.866  | -0.488 | 0.247  | 0.2548  |
| Octulose-1-phosphate (Octulose-1-P)       | Pentose phosphate pathway    | 0.055               | 1.337  | -1.043 | -0.349 | 0.221                  | -0.222 | 0.394  | 0.079  | 0.711  | 0.936  | 0.4555  |
| Octulose-bisphosphate (Octulose-BP)       | Pentose phosphate pathway    | -0.521              | 1.407  | -0.866 | -0.020 | 0.438                  | 0.081  | 0.825  | 0.670  | 1.013  | 1.365  | 0.1475  |
| Ribose-5-phosphate (Rib-5-P)              | Pentose phosphate pathway    | -0.739              | 1.324  | -0.807 | 0.223  | 0.600                  | 0.390  | 1.202  | 0.864  | 0.013  | 0.539  | 0.2147  |
| Sedoheptulose bisphosphate (S-BP)         | Pentose phosphate pathway    | -0.247              | 1.211  | -1.192 | 0.229  | 0.704                  | 0.734  | 0.705  | 1.094  | 1.544  | 2.865  | 0.0611  |
| Xylulose-5-phosphate (Xyl-5-P)            | Pentose phosphate pathway    | -0.615              | 1.421  | -0.775 | -0.031 | -0.057                 | -0.170 | 0.531  | 0.354  | 0.219  | -0.064 | 0.7547  |
| N-Carbamoyl-L-aspartate (N-carb-L-Asp)    | Energy/nucleotide metabolism | 0.983               | 0.738  | -0.925 | -0.796 | 2.927                  | 2.411  | -0.444 | -0.144 | -0.141 | 0.367  | 0.3538  |
| ATP                                       | Energy/nucleotide metabolism | -1.328              | 0.856  | -0.207 | 0.679  | 3.099                  | 2.214  | 4.221  | 3.748  | 2.332  | 3.335  | 0.0005  |
| ADP                                       | Energy/nucleotide metabolism | -0.994              | 1.377  | -0.340 | -0.043 | -0.610                 | -1.315 | -0.497 | -0.201 | 0.059  | -0.663 | 0.2779  |
| AMP                                       | Energy/nucleotide metabolism | -0.912              | 1.419  | -0.138 | -0.368 | -0.976                 | -1.360 | -0.770 | -0.626 | -0.137 | -0.566 | 0.1374  |
| dATP                                      | Energy/nucleotide metabolism | -1.243              | 1.194  | -0.092 | 0.141  | 1.402                  | 1.073  | 1.697  | 1.750  | 1.247  | 1.880  | 0.0077  |
| dAMP                                      | Energy/nucleotide metabolism | -0.943              | 1.317  | 0.205  | -0.579 | -0.756                 | -0.924 | -0.703 | -0.684 | -0.308 | -0.780 | 0.1290  |
| CTP                                       | Energy/nucleotide metabolism | -1.006              | 1.384  | -0.155 | -0.223 | 2.339                  | 1.796  | 1.773  | 1.953  | 1.685  | 1.093  | 0.0041  |
| CDP                                       | Energy/nucleotide metabolism | -0.751              | 1.471  | -0.275 | -0.444 | -0.554                 | -0.945 | -0.542 | -0.456 | -0.449 | -0.863 | 0.1603  |
| CMP                                       | Energy/nucleotide metabolism | -0.468              | 1.453  | -0.797 | -0.189 | -1.675                 | -1.845 | -1.173 | -1.399 | -1.572 | -1.795 | 0.0053  |
| dCTP                                      | Energy/nucleotide metabolism | -1.174              | 1.271  | -0.027 | -0.070 | -0.018                 | -0.399 | 0.771  | 1.046  | -0.166 | -0.200 | 0.7377  |
| dTTP                                      | Energy/nucleotide metabolism | -1.291              | 1.059  | -0.189 | 0.421  | 1.399                  | 0.973  | 2.336  | 1.854  | 0.907  | 1.643  | 0.0137  |
| dTDP                                      | Energy/nucleotide metabolism | -0.885              | 1.420  | -0.436 | -0.099 | -0.991                 | -1.514 | -0.764 | -0.669 | -0.691 | -1.023 | 0.0586  |
| GTP                                       | Energy/nucleotide metabolism | -1.330              | 1.095  | 0.164  | 0.071  | 2.705                  | 1.970  | 3.124  | 2.739  | 2.650  | 2.404  | 0.0004  |
| GDP                                       | Energy/nucleotide metabolism | -1.074              | 1.260  | 0.254  | -0.440 | -0.708                 | -1.373 | -0.214 | -0.723 | -0.603 | -1.966 | 0.1049  |
| GMP                                       | Energy/nucleotide metabolism | -1.089              | 1.211  | -0.473 | 0.352  | -2.221                 | -2.195 | -0.537 | -0.475 | -1.686 | -1.764 | 0.0302  |
| UTP                                       | Energy/nucleotide metabolism | -1.266              | 1.169  | -0.065 | 0.162  | 2.020                  | 1.453  | 2.024  | 1.911  | 2.451  | 2.779  | 0.0018  |
| UDP                                       | Energy/nucleotide metabolism | -1.059              | 1.350  | -0.222 | -0.069 | -1.258                 | -1.820 | -1.113 | -1.148 | -0.329 | -0.834 | 0.0493  |
| UMP                                       | Energy/nucleotide metabolism | -1.048              | 1.192  | -0.557 | 0.413  | -2.763                 | -2.596 | -1.747 | -1.670 | -1.893 | -1.845 | 0.0020  |
| IMP                                       | Energy/nucleotide metabolism | -0.402              | 1.299  | -1.060 | 0.163  | 0.379                  | 0.642  | 0.560  | 0.817  | 0.684  | 1.958  | 0.1246  |

**S6 Table. Metabolite z-scores and P values (page 2 of 2).**

| <b>Individual compounds (continued)</b>            | <b>Class (continued)</b>     |        |        |        |        |        |        |        |        |        |        |        |
|----------------------------------------------------|------------------------------|--------|--------|--------|--------|--------|--------|--------|--------|--------|--------|--------|
| Inosine (I)                                        | Energy/nucleotide metabolism | -0.800 | 1.387  | -0.657 | 0.070  | -0.086 | -0.004 | -0.090 | 0.034  | 0.031  | 0.796  | 0.7990 |
| Thymidine (dT)                                     | Energy/nucleotide metabolism | -0.961 | 1.397  | -0.342 | -0.094 | 0.001  | 1.107  | -0.087 | 0.075  | 0.217  | 0.811  | 0.4704 |
| ADP-D-glucose                                      | Nucleotide conjugate         | -0.611 | 1.190  | -1.012 | 0.432  | 0.592  | 0.366  | 0.619  | 1.034  | 1.018  | 2.442  | 0.1028 |
| CDP-choline                                        | Nucleotide conjugate         | -0.116 | 1.028  | -1.326 | 0.415  | -0.616 | -0.703 | -1.073 | -1.044 | -1.174 | 0.476  | 0.2084 |
| CDP-ethanolamine (CDP-ETA)                         | Nucleotide conjugate         | 0.042  | 0.527  | -1.415 | 0.847  | -1.388 | -1.248 | -1.782 | -1.549 | -1.382 | 1.195  | 0.1743 |
| S-Adenosyl-L-homocysteine (SAH)                    | Nucleotide conjugate         | -0.903 | 1.316  | -0.635 | 0.222  | -0.453 | -0.692 | -0.028 | 0.057  | -0.715 | 0.168  | 0.5489 |
| UDP-D-glucose                                      | Nucleotide conjugate         | 1.437  | -0.641 | -0.719 | -0.078 | -0.488 | -0.729 | -1.008 | -0.897 | -0.829 | -0.611 | 0.0988 |
| UDP-D-glucuronate                                  | Nucleotide conjugate         | -0.737 | 1.350  | -0.778 | 0.165  | 2.306  | 1.379  | 3.143  | 2.358  | 2.359  | 3.040  | 0.0014 |
| UDP-N-acetyl-glucosamine (UDP-NAG)                 | Nucleotide conjugate         | 0.523  | 0.722  | -1.468 | 0.223  | -0.415 | -0.852 | -0.551 | -0.022 | -0.997 | 0.175  | 0.3623 |
| Glutathione (GSH)                                  | Redox metabolism             | -0.719 | 0.956  | -0.997 | 0.759  | -1.442 | -1.532 | -0.992 | -0.713 | -0.708 | 0.008  | 0.1044 |
| Glutathione disulfide (GSSG)                       | Redox metabolism             | -0.244 | 0.980  | -1.292 | 0.557  | -0.389 | -0.414 | 0.219  | 0.303  | 0.092  | 0.895  | 0.8073 |
| NAD+                                               | Redox metabolism             | -0.605 | 1.269  | -0.965 | 0.302  | -0.260 | -0.812 | -0.232 | -0.035 | -0.331 | 1.202  | 0.8858 |
| NADH                                               | Redox metabolism             | -0.646 | -0.636 | -0.182 | 1.465  | -0.539 | -1.587 | -1.010 | 0.590  | 2.142  | 3.280  | 0.6599 |
| NADP+                                              | Redox metabolism             | -0.407 | 1.470  | -0.763 | -0.300 | 0.348  | 0.459  | 0.843  | 0.844  | 0.454  | 0.806  | 0.1675 |
| Phenylalanine (Phe)                                | Amino acid                   | -0.740 | 1.474  | -0.440 | -0.294 | 1.139  | 1.103  | 1.904  | 0.922  | 1.075  | 1.105  | 0.0237 |
| Tryptophan (Trp)                                   | Amino acid                   | -0.921 | 1.418  | -0.342 | -0.154 | 1.543  | 2.473  | 0.668  | 1.794  | 2.390  | 1.388  | 0.0115 |
| N-Acetyl-glucosamine-1,6-bisphosphate (NAG-1,6-BP) | Amino acid conjugate         | -0.830 | 1.140  | -0.849 | 0.539  | -0.368 | -0.738 | -0.434 | 0.334  | 0.629  | 1.162  | 0.8618 |
| N-Acetyl-glutamate (NAc-Glu)                       | Amino acid conjugate         | -0.422 | 1.181  | -1.134 | 0.375  | 0.521  | 1.275  | 0.182  | 1.011  | 0.868  | 1.559  | 0.0913 |
| N-Acetyl-glutamine (NAc-Gln)                       | Amino acid conjugate         | -0.970 | 0.985  | -0.746 | 0.731  | 0.955  | 0.858  | 1.690  | 2.297  | 2.337  | 3.572  | 0.0172 |
| N-Acetyl-L-alanine (NAc-L-Ala)                     | Amino acid conjugate         | -0.669 | 0.481  | -0.979 | 1.167  | 0.648  | 0.197  | 0.360  | 0.661  | -0.844 | 0.529  | 0.6121 |
| DLH                                                | Peptide                      | -0.943 | 1.311  | -0.587 | 0.218  | -1.504 | -1.590 | -1.395 | -1.261 | -1.927 | -1.639 | 0.0055 |
| DLS                                                | Peptide                      | -1.126 | 0.828  | -0.558 | 0.857  | 0.017  | -0.147 | -0.373 | -0.032 | -0.136 | 0.469  | 0.9380 |
| HVDD                                               | Peptide                      | -0.841 | 1.071  | -0.863 | 0.633  | -0.347 | -0.426 | -1.217 | -0.961 | -1.155 | -0.702 | 0.1046 |
| LD                                                 | Peptide                      | -0.067 | 1.388  | -0.974 | -0.347 | 0.886  | 0.887  | 0.574  | 0.718  | -0.236 | 0.552  | 0.2448 |
| PD                                                 | Peptide                      | -0.754 | 0.544  | -0.923 | 1.133  | -0.798 | -0.522 | -0.631 | -0.220 | -0.188 | 1.584  | 0.8335 |
| PE                                                 | Peptide                      | -0.649 | 0.860  | -1.059 | 0.848  | 0.704  | -0.367 | 0.387  | 0.525  | -0.710 | 1.134  | 0.6127 |
| PEE                                                | Peptide                      | -0.779 | 1.068  | -0.923 | 0.634  | 0.392  | 0.253  | 0.512  | 1.102  | -0.543 | 0.563  | 0.4524 |
| PEEK                                               | Peptide                      | -0.815 | 0.507  | -0.854 | 1.161  | 2.276  | 1.975  | 1.258  | 1.905  | 1.033  | 4.231  | 0.0169 |
| PVNF                                               | Peptide                      | -0.923 | 1.294  | -0.635 | 0.264  | -0.147 | -0.120 | -0.089 | -0.032 | -1.038 | -0.784 | 0.4389 |
| SD                                                 | Peptide                      | -0.685 | 1.101  | -0.993 | 0.577  | -0.045 | -0.076 | 0.162  | 0.544  | -0.141 | 0.839  | 0.6428 |
| VD                                                 | Peptide                      | -0.463 | 1.069  | -1.157 | 0.551  | 0.869  | 0.350  | 0.571  | 0.171  | -0.221 | 1.496  | 0.3111 |
| Biotin                                             | Vitamin/cofactor             | -0.708 | 1.402  | 0.034  | -0.729 | 1.458  | 2.460  | 1.325  | 1.461  | 1.196  | 0.897  | 0.0156 |
| Folate                                             | Vitamin/cofactor             | -0.423 | -0.773 | 1.466  | -0.270 | 2.430  | 2.492  | 4.422  | 5.361  | 5.072  | 3.248  | 0.0011 |
| Pantothenate                                       | Vitamin/cofactor             | -0.721 | 1.475  | -0.480 | -0.274 | 1.482  | 1.254  | 0.526  | 0.939  | 0.323  | 0.197  | 0.1372 |

Metabolite compound classes and individual metabolite z-scores (see **Materials and Methods** for z-score derivation). P values were determined using one-way ANOVA. Corresponding metabolite signal intensities are reported in S5 Table. Metabolites were harvested on three independent occasions, yielding 4 and 6 individual replicates (r) for the GC03<sup>Dd2</sup> and GC03<sup>Cam734</sup> strains, respectively. P values <0.05 are shaded in gray.
