# Supplementary material for: Evolution of Fitness Cost-Neutral Mutant PfCRT Conferring P. falciparum 4-Aminoquinoline Drug Resistance Is Accompanied by Altered Parasite Metabolism and Digestive Vacuole Physiology
Source: PubMed Central journal article supplement (PMC5104409; doi:10.1371/journal.ppat.1005976), 2016-11-10
Supplement: ppat.1005976.s014.pdf [file ppat.1005976.s014.pdf]

**S7 Table. Digestive vacuole volume size and pH of *pfcr*-modified lines.**

| Line                         | DV volume size $\pm$ SEM ( $\mu\text{m}^3$ ) |                 |            | pH $\pm$ SEM    |                 |
|------------------------------|----------------------------------------------|-----------------|------------|-----------------|-----------------|
|                              | No drug                                      | CQ              | % increase | No drug         | CQ              |
| GC03 <sup>GC03</sup>         | 1.92 $\pm$ 0.04                              | 2.16 $\pm$ 0.72 | 13%        | 5.74 $\pm$ 0.01 | 5.70 $\pm$ 0.01 |
| GC03 <sup>Cam734</sup>       | 2.52 $\pm$ 0.03                              | 3.10 $\pm$ 0.17 | 23%        | 5.55 $\pm$ 0.02 | 5.54 $\pm$ 0.01 |
| GC03 <sup>Cam734 F144A</sup> | 2.34 $\pm$ 0.02                              | 2.75 $\pm$ 0.21 | 17%        | 5.61 $\pm$ 0.02 | 5.61 $\pm$ 0.01 |
| GC03 <sup>Dd2</sup>          | 2.79 $\pm$ 0.05                              | 3.72 $\pm$ 0.13 | 33%        | 5.24 $\pm$ 0.01 | 5.28 $\pm$ 0.02 |

For the indicated isogenic, *pfcr*-modified lines, digestive vacuole (DV) volume size and pH were determined using spinning disk confocal microscopy and single-cell photometry, respectively, as detailed in **Supplementary Materials and**

**Methods**. Measurements were made following 30 min exposure to no drug or 2 $\times$  CQ LD<sub>50</sub>. Results are reported as mean

$\pm$  SEM DV volume size ( $\mu\text{m}^3$ ) or pH, as determined for  $\geq 20$  parasites, beginning in each case with tightly synchronized young trophozoites. DV volume values for CQ-treated parasites were compared against those of untreated controls to determine the percent increase in size.
